# Supplementary material
Source: MDPI journal article supplement (https://www.mdpi.com/2306-5338/10/12/218)
Supplement: s1 [file s1 › hydrology-2720148-supplementary.pdf]

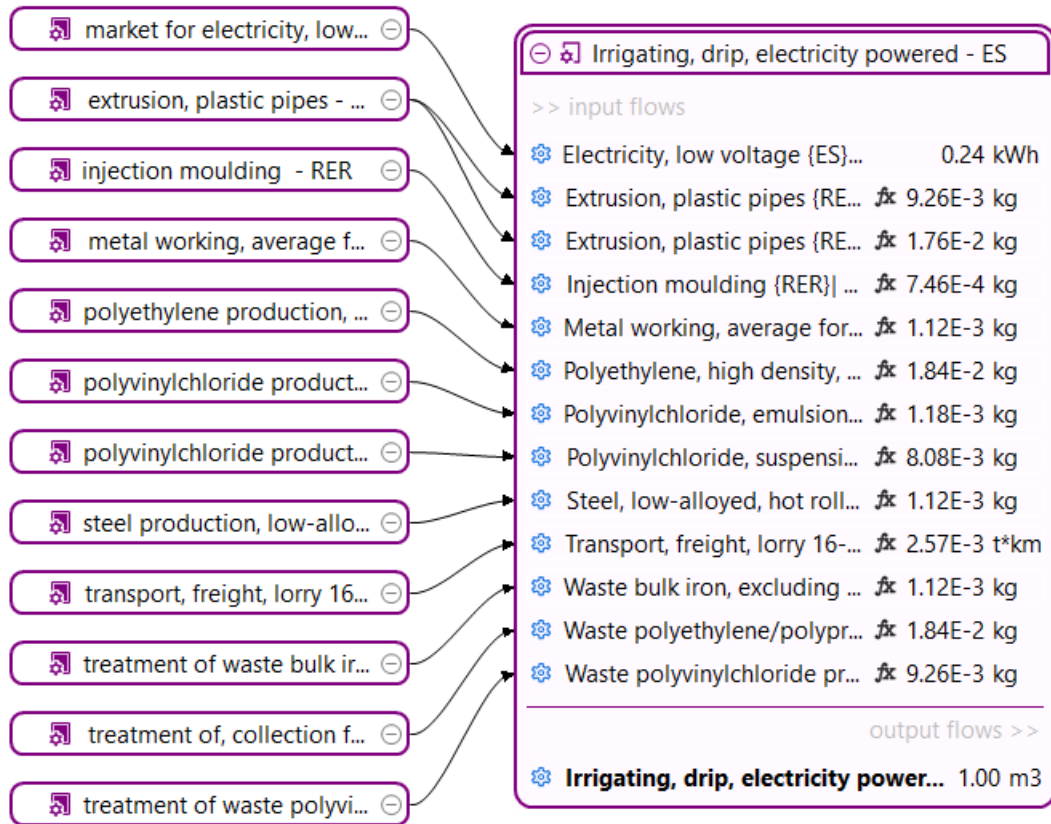

Figure S1. Model graph for drip irrigation (electricity powered).

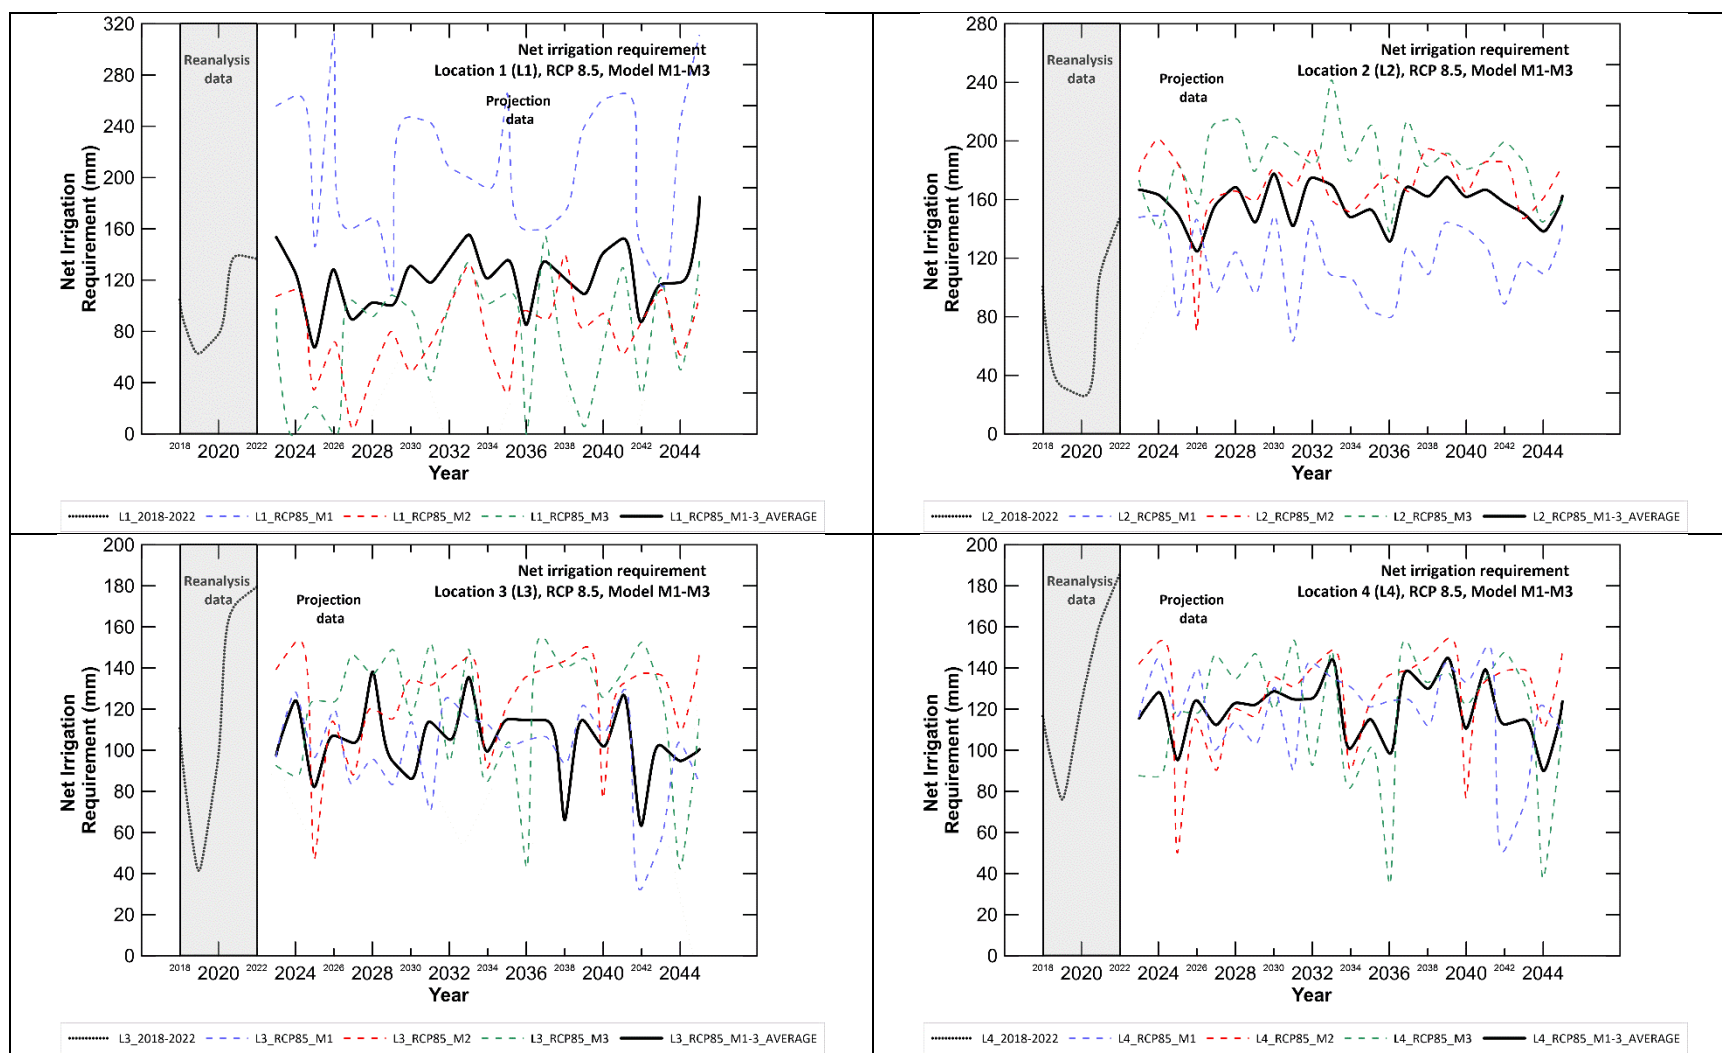

Figure S2. Net irrigation water needs for the four locations (LOC1 – Pafos; LOC2 – Lefkosia, LOC3 – Ammochostos; LOC4 - Limassol), under the RCP 8.5 scenario.
